# Supplementary material for: AST/ALT ratio as a predictor of mortality and exacerbations of PM/DM-ILD in 1 year—a retrospective cohort study with 522 cases
Source: Springer Nature journal article supplement (doi:10.1186/s13075-020-02286-w), 2020-09-19
Supplement: MOESM1 [file 18396726]

**Correlations**

|                |                         |                         | HB     | PLT     | WBC     | NLR     | EO      | AST/ALT | ALB     | UA/CREA | TG      | LDL     | CK     |
|----------------|-------------------------|-------------------------|--------|---------|---------|---------|---------|---------|---------|---------|---------|---------|--------|
| Spearman's rho | HB                      | Correlation Coefficient | 1.000  | -.013   | .284**  | -.078   | .006    | -.333** | .454**  | .012    | .026    | .413**  | .041   |
|                |                         | Sig. (2-tailed)         | .      | .761    | .000    | .076    | .899    | .000    | .788    | .557    | .000    | .355    |        |
|                |                         | N                       | 522    | 522     | 522     | 522     | 522     | 522     | 522     | 522     | 522     | 522     | 522    |
|                | PLT                     | Correlation Coefficient | -.013  | 1.000   | .410**  | .139**  | .115**  | .035    | -.084   | .113**  | -.014   | .066    | .169** |
|                |                         | Sig. (2-tailed)         | .761   | .       | .000    | .001    | .008    | .429    | .055    | .010    | .747    | .134    | .000   |
|                |                         | N                       | 522    | 522     | 522     | 522     | 522     | 522     | 522     | 522     | 522     | 522     | 522    |
|                | WBC                     | Correlation Coefficient | .284** | .410**  | 1.000   | .409**  | -.114** | -.286** | .055    | .048    | .033    | .268**  | .238** |
|                |                         | Sig. (2-tailed)         | .000   | .000    | .       | .000    | .009    | .000    | .212    | .277    | .449    | .000    | .000   |
|                |                         | N                       | 522    | 522     | 522     | 522     | 522     | 522     | 522     | 522     | 522     | 522     | 522    |
|                | NLR                     | Correlation Coefficient | -.078  | .139**  | .409**  | 1.000   | -.281** | -.001   | -.240** | -.127** | .051    | -.015   | .027   |
|                |                         | Sig. (2-tailed)         | .076   | .001    | .000    | .       | .000    | .985    | .000    | .004    | .247    | .734    | .533   |
|                |                         | N                       | 522    | 522     | 522     | 522     | 522     | 522     | 522     | 522     | 522     | 522     | 522    |
|                | EO                      | Correlation Coefficient | .006   | .115**  | -.114** | -.281** | 1.000   | .180**  | .044    | .125**  | -.072   | -.137** | .242** |
|                |                         | Sig. (2-tailed)         | .899   | .008    | .009    | .000    | .       | .000    | .319    | .004    | .101    | .002    | .000   |
|                |                         | N                       | 522    | 522     | 522     | 522     | 522     | 522     | 522     | 522     | 522     | 522     | 522    |
| AST/ALT        | Correlation Coefficient | -.333**                 | .035   | -.286** | -.001   | .180**  | 1.000   | -.315** | .065    | .000    | -.354** | .185**  |        |
|                | Sig. (2-tailed)         | .000                    | .429   | .000    | .985    | .000    | .       | .000    | .139    | .998    | .000    | .000    |        |
|                | N                       | 522                     | 522    | 522     | 522     | 522     | 522     | 522     | 522     | 522     | 522     | 522     |        |
| ALB            | Correlation Coefficient | .454**                  | -.084  | .055    | -.240** | .044    | -.315** | 1.000   | .029    | .075    | .368**  | -.095** |        |
|                | Sig. (2-tailed)         | .000                    | .055   | .212    | .000    | .319    | .000    | .       | .515    | .088    | .000    | .030    |        |
|                | N                       | 522                     | 522    | 522     | 522     | 522     | 522     | 522     | 522     | 522     | 522     | 522     |        |
| UA/CREA        | Correlation Coefficient | .012                    | .113** | .048    | -.127** | .125**  | .065    | .029    | 1.000   | .087**  | .062    | .288**  |        |
|                | Sig. (2-tailed)         | .788                    | .010   | .277    | .004    | .004    | .139    | .515    | .       | .048    | .154    | .000    |        |
|                | N                       | 522                     | 522    | 522     | 522     | 522     | 522     | 522     | 522     | 522     | 522     | 522     |        |
| TG             | Correlation Coefficient | .026                    | -.014  | .033    | .051    | -.072   | .000    | .075    | .087**  | 1.000   | .115**  | .011    |        |
|                | Sig. (2-tailed)         | .557                    | .747   | .449    | .247    | .101    | .998    | .088    | .048    | .       | .009    | .795    |        |
|                | N                       | 522                     | 522    | 522     | 522     | 522     | 522     | 522     | 522     | 522     | 522     | 522     |        |
| LDL            | Correlation Coefficient | .413**                  | .066   | .268**  | -.015   | -.137** | -.354** | .368**  | .062    | .115**  | 1.000   | -.002   |        |
|                | Sig. (2-tailed)         | .000                    | .134   | .000    | .734    | .002    | .000    | .000    | .154    | .009    | .       | .959    |        |
|                | N                       | 522                     | 522    | 522     | 522     | 522     | 522     | 522     | 522     | 522     | 522     | 522     |        |
| CK             | Correlation Coefficient | .041                    | .169** | .238**  | .027    | .242**  | .185**  | -.095** | .288**  | .011    | -.002   | 1.000   |        |
|                | Sig. (2-tailed)         | .355                    | .000   | .000    | .533    | .000    | .000    | .030    | .000    | .795    | .959    | .       |        |
|                | N                       | 522                     | 522    | 522     | 522     | 522     | 522     | 522     | 522     | 522     | 522     | 522     |        |

\*\* . Correlation is significant at the 0.01 level (2-tailed).

\* . Correlation is significant at the 0.05 level (2-tailed).
